# Supplementary material for: First case of chronic wasting disease in Europe in a Norwegian free-ranging reindeer
Source: PubMed Central journal article supplement (PMC5024462; doi:10.1186/s13567-016-0375-4), 2016-09-15

Sha31 mAb

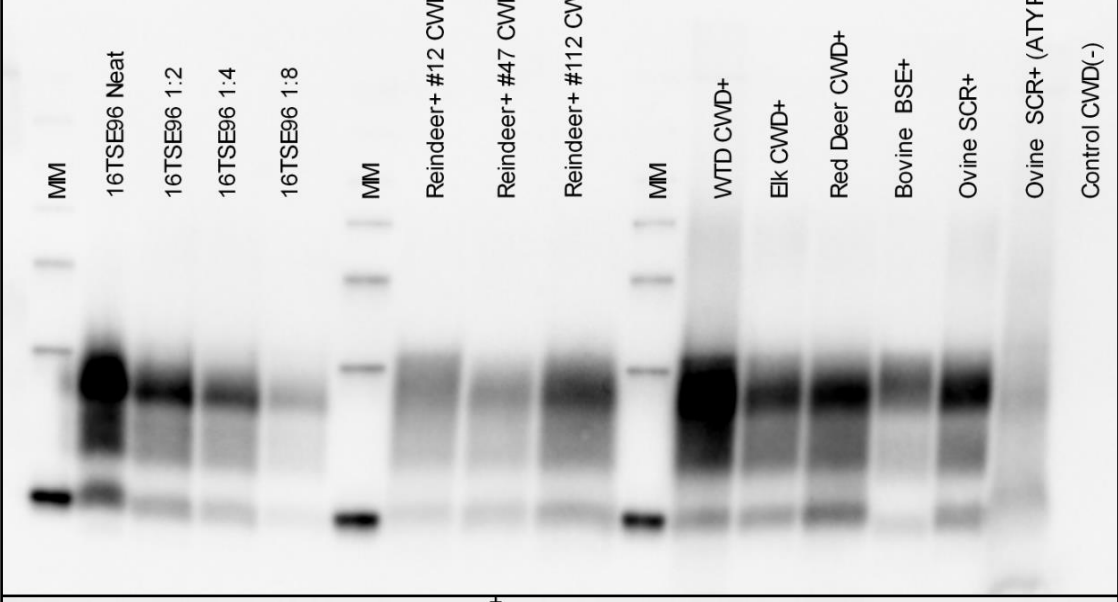

P4 mAb

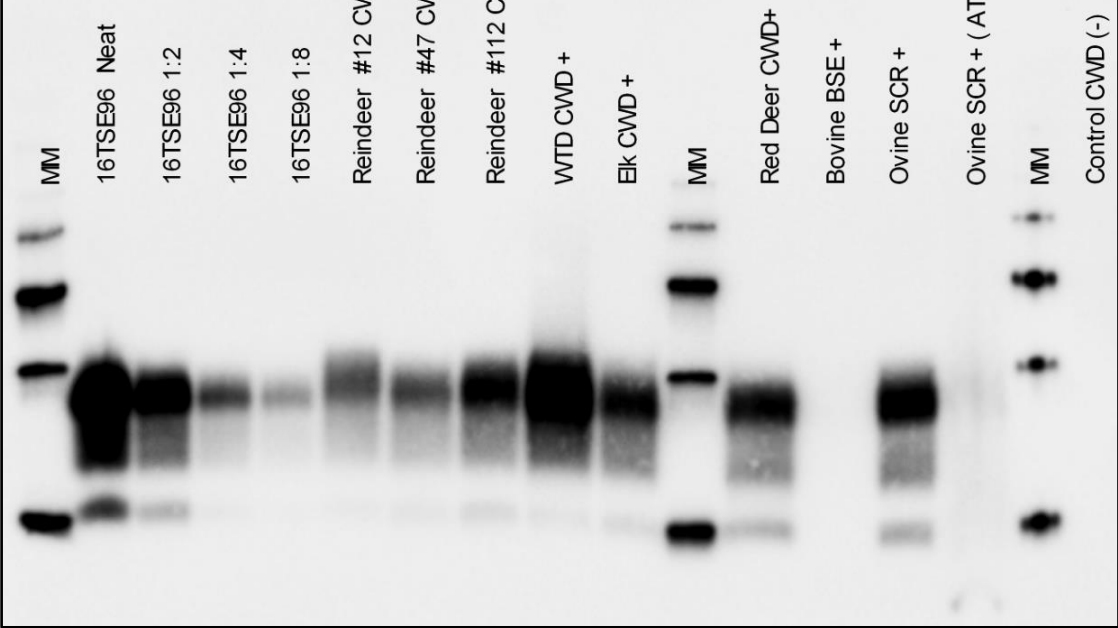

Supplement: 13567_2016_375_MOESM1_ESM.pdf [file 13567_2016_375_MOESM1_ESM.pdf]
